# Supplementary material
Source: PubMed Central journal article supplement (PMC6750030)
Supplement: NIHMS1533946-supplement-Supplemental_Material.pdf [file NIHMS1533946-supplement-Supplemental_Material.pdf]

## SUPPLEMENTAL MATERIAL

**Supplementary Table 1.**

**Baseline characteristics and echocardiography results in ZSF1 rats at 8, 14, 20 wks of age**

| Parameter       | Lean ZSF1  |            |            | Obese ZSF1  |                           |                           |
|-----------------|------------|------------|------------|-------------|---------------------------|---------------------------|
|                 | 8 wks      | 14 wks     | 20 wks     | 8 wks       | 14 wks                    | 20 wks                    |
| MABP (mmHg)     | -          | 143 ± 20   | 148 ± 6    | -           | 143 ± 6                   | 154 ± 8                   |
| Body Weight (g) | -          | 378 ± 17   | 472 ± 48   | -           | 516 ± 34 <sup>***</sup>   | 635 ± 62 <sup>***</sup>   |
| Glucose (mg/dL) | -          | 237 ± 36   | 214 ± 35   | -           | 324 ± 53 <sup>*</sup>     | 303 ± 70 <sup>**</sup>    |
| SubQ Fat (g)    | -          | 10.0 ± 0.8 | 13.6 ± 3.8 | -           | 52.3 ± 4.3 <sup>***</sup> | 62 ± 13 <sup>***</sup>    |
| RetroP Fat (g)  | -          | 4.8 ± 0.3  | 6.3 ± 1.3  | -           | 16.2 ± 1.7 <sup>***</sup> | 33.2 ± 4.8 <sup>***</sup> |
| HW (mg)         | -          | 1243 ± 25  | 1455 ± 112 | -           | 1456 ± 101                | 1722 ± 190 <sup>***</sup> |
| RV Weight (mg)  | -          | 208 ± 87   | 278 ± 51   | -           | 278 ± 43                  | 377 ± 70 <sup>**</sup>    |
| LV Weight (mg)  | -          | 1017 ± 25  | 1099 ± 134 | -           | 1294 ± 103 <sup>*</sup>   | 1287 ± 160 <sup>*</sup>   |
| HW/TL           | -          | 31.5 ± 0.6 | 35.0 ± 2.6 | -           | 38.9 ± 2.2 <sup>*</sup>   | 42.8 ± 3.9 <sup>***</sup> |
| RV/TL           | -          | 5.2 ± 2.2  | 6.3 ± 1.3  | -           | 7.4 ± 1.2 <sup>*</sup>    | 9.2 ± 1.4 <sup>***</sup>  |
| LV/TL           | -          | 25.7 ± 0.8 | 25.9 ± 3.2 | -           | 31.2 ± 2.9                | 31.8 ± 4.2 <sup>**</sup>  |
| HR (bpm)        | 388 ± 16   | 395 ± 20   | 394 ± 16   | 365 ± 33    | 337 ± 36 <sup>***</sup>   | 303 ± 17 <sup>***</sup>   |
| LV Mass (mg)    | 803 ± 71   | 1160 ± 67  | 1206 ± 106 | 869 ± 31    | 1607 ± 178 <sup>***</sup> | 1773 ± 123 <sup>***</sup> |
| LVAW; d (mm)    | 1.45 ± 0.2 | 1.71 ± 0.3 | 1.82 ± 0.3 | 1.68 ± 0.3  | 2.17 ± 0.2 <sup>**</sup>  | 2.42 ± 0.3 <sup>***</sup> |
| LVAW; s (mm)    | 3.22 ± 0.3 | 3.18 ± 0.3 | 3.59 ± 0.3 | 3.12 ± 0.2  | 3.45 ± 0.2                | 4.08 ± 0.3 <sup>**</sup>  |
| LVID; d (mm)    | 6.43 ± 0.5 | 7.39 ± 0.3 | 7.48 ± 0.3 | 6.17 ± 0.2  | 7.74 ± 0.2                | 7.75 ± 0.3                |
| LVID; s (mm)    | 2.30 ± 0.4 | 3.17 ± 0.3 | 3.14 ± 0.3 | 2.67 ± 0.3  | 3.33 ± 0.2                | 3.2 ± 0.3                 |
| LVPW; d (mm)    | 2.21 ± 0.2 | 2.31 ± 0.3 | 2.30 ± 0.3 | 2.30 ± 0.20 | 2.62 ± 0.2 <sup>**</sup>  | 2.89 ± 0.3 <sup>***</sup> |
| LVPW; s (mm)    | 3.48 ± 0.3 | 3.81 ± 0.3 | 3.84 ± 0.3 | 3.48 ± 0.40 | 4.38 ± 0.2 <sup>**</sup>  | 4.39 ± 0.3 <sup>***</sup> |
| EF (%)          | 92 ± 2     | 89 ± 3     | 88 ± 3     | 89 ± 2      | 87 ± 2                    | 87 ± 3                    |
| FS (%)          | 64.3 ± 1.0 | 60.8 ± 4.8 | 58.7 ± 4.5 | 60.4 ± 2.4  | 57.8 ± 2.6                | 58.8 ± 2.5                |
| SV (μL)         | 181 ± 38   | 249 ± 8    | 255 ± 19   | 153 ± 16    | 264 ± 17                  | 266 ± 28                  |
| CO (mL/min)     | 70 ± 14    | 99 ± 6     | 100 ± 10   | 56 ± 5      | 89 ± 10                   | 81 ± 8 <sup>***</sup>     |

|           |            |            |            |            |            |                           |
|-----------|------------|------------|------------|------------|------------|---------------------------|
| E/A Ratio | 1.83 ± 0.3 | 1.84 ± 0.3 | 1.90 ± 0.3 | 1.72 ± 0.2 | 1.71 ± 0.2 | 1.39 ± 0.3 <sup>***</sup> |
| DT (ms)   | 14.0 ± 1.0 | 14.6 ± 1.4 | 12.7 ± 1.6 | 15 ± 1.4   | 16.3 ± 1.9 | 22.5 ± 3.4 <sup>***</sup> |

Data are shown as Mean ± SD. Data was analyzed by two-way ANOVA. \* indicates  $p < 0.05$ , \*\* indicates  $p < 0.01$ , \*\*\* indicates  $p < 0.001$  compared between age matched lean and obese ZSF1 groups composed of at least 6 animals per groups. MABP, mean arterial blood pressure; HR, heart rate; BW, body weight; SubQ Fat, subcutaneous fat; RetroP Fat, retroperitoneal fat; HW, heart weight; RV, right ventricle; LV, left ventricle; TL, tibia length; LV, left ventricle; LVAW, left ventricle anterior wall thickness at end diastole (d) or end systole (s); LVID, left ventricular internal diameter at end diastole (d) or end systole (s); LVPW, left ventricle posterior wall thickness at end diastole (d) or end systole (s); EF, ejection fraction; FS, fraction shortening; SV, stroke volume; CO, cardiac output; E/A ratio, peak velocity of early/late mitral inflow ratio; DT, deceleration time; - indicates no data was collected.

**Supplementary Table 2.**  
**Echocardiography results and characteristics of ZSF1 rats in ABT-702 treatment study**

| Parameter       | Lean ZSF1: Vehicle to Vehicle |             |             | Lean ZSF1: ABT-702 to Vehicle |            |             |
|-----------------|-------------------------------|-------------|-------------|-------------------------------|------------|-------------|
|                 | 16 wks                        | 24 wks      | 32 wks      | 16 wks                        | 24 wks     | 32 wks      |
| HR (bpm)        | 416 ± 14                      | 409 ± 2     | 418 ± 4     | 397 ± 13                      | 394 ± 12   | 411 ± 8     |
| LV Mass (mg)    | 1162 ± 110                    | 1223 ± 68   | 1170 ± 82   | 1177 ± 37                     | 1268 ± 49  | 1232 ± 140  |
| LVAW; d (mm)    | 1.77 ± 0.2                    | 1.87 ± 0.3  | 1.90 ± 0.3  | 1.90 ± 0.3                    | 1.87 ± 0.2 | 1.82 ± 0.3  |
| LVAW; s (mm)    | 3.47 ± 0.03                   | 3.80 ± 0.3* | 3.89 ± 0.3* | 3.55 ± 0.3                    | 3.75 ± 0.3 | 3.88 ± 0.3  |
| LVID; d (mm)    | 7.55 ± 0.3                    | 7.68 ± 0.3  | 7.58 ± 0.4  | 7.50 ± 0.4                    | 7.94 ± 0.3 | 8.06 ± 0.2  |
| LVID; s (mm)    | 3.1 ± 0.2                     | 3.03 ± 0.3  | 2.91 ± 0.3  | 3.0 ± 0.3                     | 3.19 ± 0.2 | 3.29 ± 0.2  |
| LVPW; d (mm)    | 2.12 ± 0.2                    | 2.18 ± 0.3  | 2.08 ± 0.2  | 2.12 ± 0.2                    | 2.12 ± 0.2 | 2.02 ± 0.2  |
| LVPW; s (mm)    | 4.0 ± 0.2                     | 3.98 ± 0.3  | 3.79 ± 0.3  | 3.99 ± 0.3                    | 4.00 ± 0.2 | 3.84 ± 0.31 |
| EF (%)          | 88 ± 2                        | 88 ± 2      | 89 ± 2      | 88 ± 2                        | 88 ± 2     | 87 ± 2      |
| FS (%)          | 59.2 ± 1.4                    | 59.1 ± 1.0  | 61.1 ± 2.3  | 59.1 ± 2.8                    | 59.3 ± 3.2 | 58.3 ± 2.8  |
| SV (µL)         | 268 ± 38                      | 268 ± 22    | 274 ± 26    | 245 ± 44                      | 294 ± 10   | 297 ± 30    |
| CO (mL/min)     | 112 ± 16                      | 109 ± 10    | 115 ± 12    | 97 ± 16                       | 116 ± 6    | 122 ± 14*   |
| E/A Ratio       | 1.98 ± 0.3                    | 1.97 ± 0.3  | 1.96 ± 0.3  | 1.92 ± 0.3                    | 1.97 ± 0.3 | 1.97 ± 0.3  |
| DT (msec)       | 11.0 ± 0.2                    | 11.8 ± 0.4  | 11.6 ± 0.4  | 11.3 ± 0.2                    | 12.5 ± 1.0 | 12.3 ± 0.6  |
| BP (mmHg)       | -                             | -           | 134 ± 8     | -                             | -          | 131 ± 22    |
| Body Weight (g) | -                             | -           | 526 ± 20    | -                             | -          | 517 ± 62    |
| SubQ Fat (g)    | -                             | -           | 18 ± 4      | -                             | -          | 20 ± 6      |
| RetroP Fat (g)  | -                             | -           | 6 ± 2       | -                             | -          | 7 ± 2       |
| H Weight (mg)   | -                             | -           | 1547 ± 102  | -                             | -          | 1535 ± 148  |
| HW/TL           | -                             | -           | 35.2 ± 2.0  | -                             | -          | 35.3 ± 4.0  |
| Lung Weight/TL  | -                             | -           | 36.1 ± 2.8  | -                             | -          | 38.2 ± 3.6  |

| Parameter      | Obese ZSF1: Vehicle to ABT-702 |                          |                            | Obese ZSF1: ABT-702 to Vehicle |                         |                            |
|----------------|--------------------------------|--------------------------|----------------------------|--------------------------------|-------------------------|----------------------------|
|                | 16 wks                         | 24 wks                   | 32 wks                     | 16 wks                         | 24 wks                  | 32 wks                     |
| HR (bpm)       | 347 ± 8 <sup>#</sup>           | 352 ± 8 <sup>#</sup>     | 323 ± 6 <sup>#</sup>       | 358 ± 28 <sup>#</sup>          | 357 ± 18 <sup>#</sup>   | 352 ± 16 <sup>#</sup>      |
| LV Mass (mg)   | 1594 ± 54 <sup>#</sup>         | 1842±174 <sup>*#</sup>   | 1883 ± 186 <sup>*#</sup>   | 1519 ± 124 <sup>#</sup>        | 1598 ± 52 <sup>#</sup>  | 1864 ± 162 <sup>*\$#</sup> |
| LVAW; d (mm)   | 2.20 ± 0.2 <sup>#</sup>        | 2.27 ± 0.2 <sup>#</sup>  | 2.51 ± 0.2 <sup>*\$#</sup> | 2.17 ± 0.2 <sup>#</sup>        | 2.17 ± 0.2 <sup>#</sup> | 2.51 ± 0.2 <sup>*\$#</sup> |
| LVAW; s (mm)   | 3.68 ± 0.2                     | 4.15 ± 0.2 <sup>*#</sup> | 4.30 ± 0.2 <sup>*\$#</sup> | 3.74 ± 0.3                     | 4.05 ± 0.2 <sup>#</sup> | 4.34 ± 0.2 <sup>*\$#</sup> |
| LVID; d (mm)   | 7.54 ± 0.5                     | 8.00 ± 0.2               | 7.66 ± 0.5                 | 7.75 ± 0.5                     | 8.09 ± 0.2              | 7.65 ± 0.5                 |
| LVID; s (mm)   | 3.06 ± 0.2                     | 3.15 ± 0.2               | 3.10 ± 0.2                 | 3.16 ± 0.2                     | 3.17 ± 0.2              | 3.08 ± 0.2                 |
| LVPW; d (mm)   | 2.75 ± 0.2 <sup>#</sup>        | 2.82 ± 0.4 <sup>#</sup>  | 3.00 ± 0.2 <sup>#</sup>    | 2.45 ± 0.2 <sup>#</sup>        | 2.46 ± 0.2 <sup>#</sup> | 3.02 ± 0.2 <sup>*\$#</sup> |
| LVPW; s (mm)   | 4.45 ± 0.2 <sup>#</sup>        | 4.35 ± 0.2 <sup>#</sup>  | 4.54 ± 0.2 <sup>#</sup>    | 4.17 ± 0.2                     | 4.20 ± 0.2              | 4.64 ± 0.2 <sup>*\$#</sup> |
| EF (%)         | 87 ± 2                         | 88 ± 2                   | 87 ± 4                     | 88 ± 2                         | 88 ± 4                  | 87 ± 2                     |
| FS (%)         | 57.9 ± 3.2                     | 59.3 ± 2.2               | 58.1 ± 4.4                 | 59.2 ± 1.0                     | 60.4 ± 4.8              | 58.0 ± 1.0                 |
| SV (µL)        | 247 ± 40                       | 295 ± 12                 | 257 ± 28                   | 283 ± 30                       | 311 ± 12                | 253 ± 40                   |
| CO (mL/min)    | 86 ± 12 <sup>#</sup>           | 104 ± 4                  | 83 ± 8 <sup>#</sup>        | 101 ± 6                        | 111 ± 6                 | 89 ± 12 <sup>#</sup>       |
| E/A Ratio      | 1.87 ± 0.3                     | 1.38 ± 0.2 <sup>*#</sup> | 1.62 ± 0.3 <sup>*\$#</sup> | 1.89 ± 0.3                     | 1.95 ± 0.3              | 1.44 ± 0.2 <sup>*\$#</sup> |
| DT (ms)        | 14.3 ± 0.2 <sup>#</sup>        | 20.6 ± 2.2 <sup>*#</sup> | 14.5 ± 0.8 <sup>\$#</sup>  | 13.7 ± 0.6 <sup>#</sup>        | 12.5 ± 0.6              | 17.8 ± 1.9 <sup>*\$#</sup> |
| BP (mmHg)      | -                              | -                        | 137 ± 16                   | -                              | -                       | 139 ± 12                   |
| BW (g)         | -                              | -                        | 718 ± 22 <sup>#</sup>      | -                              | -                       | 715 ± 42 <sup>#</sup>      |
| SubQ Fat (g)   | -                              | -                        | 83 ± 24 <sup>#</sup>       | -                              | -                       | 86 ± 16 <sup>#</sup>       |
| RetroP Fat (g) | -                              | -                        | 44 ± 4 <sup>#</sup>        | -                              | -                       | 51 ± 8 <sup>#</sup>        |
| HW (mg)        | -                              | -                        | 1878 ± 24 <sup>#</sup>     | -                              | -                       | 1735 ± 76                  |
| HW/TL          | -                              | -                        | 43.9 ± 0.8 <sup>#</sup>    | -                              | -                       | 41.0 ± 1.6 <sup>#</sup>    |
| Lung Weight/TL | -                              | -                        | 38.7 ± 1.2                 | -                              | -                       | 42 ± 3.2                   |

Data are shown as Mean  $\pm$  SD. Data was analyzed by repeated measures of two-way ANOVA. Significance was determined by Tukey's post hoc test. \* p <0.05 compared to 16 wks within group, \$ indicates p <0.05 compared to 24 wks within group, # indicates p <0.05 compared lean to age-matched obese ZSF1 rats; 4 animals per each group. HR, heart weight; LV, left ventricle; LVAW, left ventricle anterior wall thickness at end diastole (d) or end systole (s); LVID, left ventricular internal diameter at end diastole (d) or end systole (s); LVPW, left ventricle posterior wall thickness at end diastole (d) or end systole (s); EF, ejection fraction; FS, fraction shortening; SV, stroke volume; CO, cardiac output; E/A ratio, peak velocity of early/late mitral inflow ratio; DT, deceleration time; BP, blood pressure; BW, body weight; SubQ Fat, subcutaneous fat; RetroP Fat, retroperitoneal fat; HW, heart weight; TL, tibia length; - indicates no data was collected.

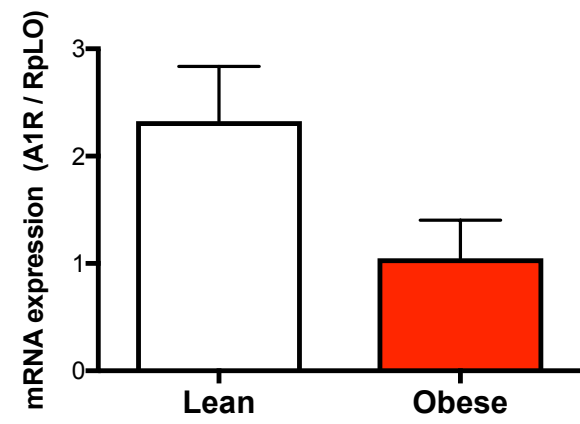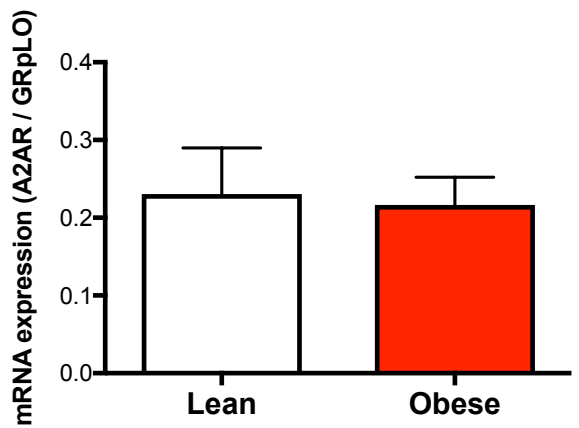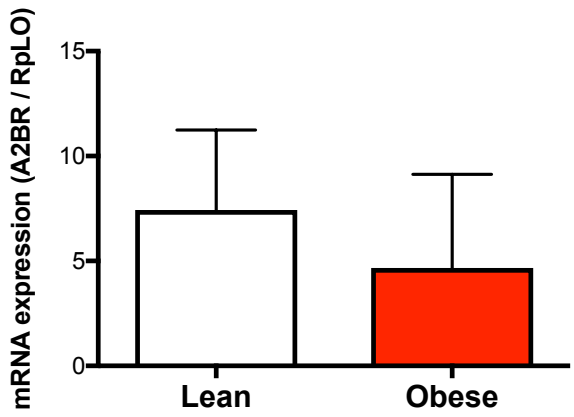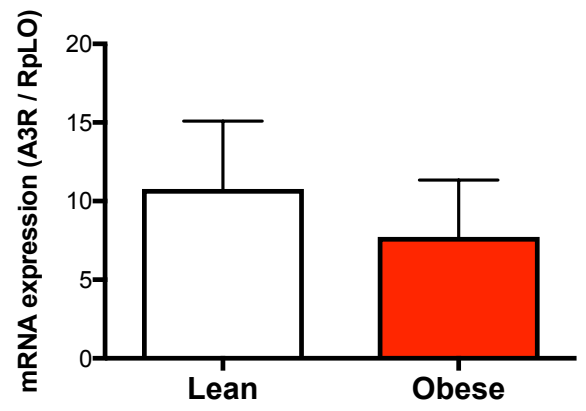

**Supplementary Figure 1.** RT-qPCR analysis for adenosine A1, A2A, A2B and A3 receptor mRNA expression in skeletal muscle artery at 20 weeks of age in lean and obese ZSF1 rats (n=5-6 in each group).
